# Supplementary material
Source: Springer Nature journal article supplement (https://www.springermedizin.de/resource/supplementary/13002_2008_136_MOESM11_ESM.pdf/9627318)

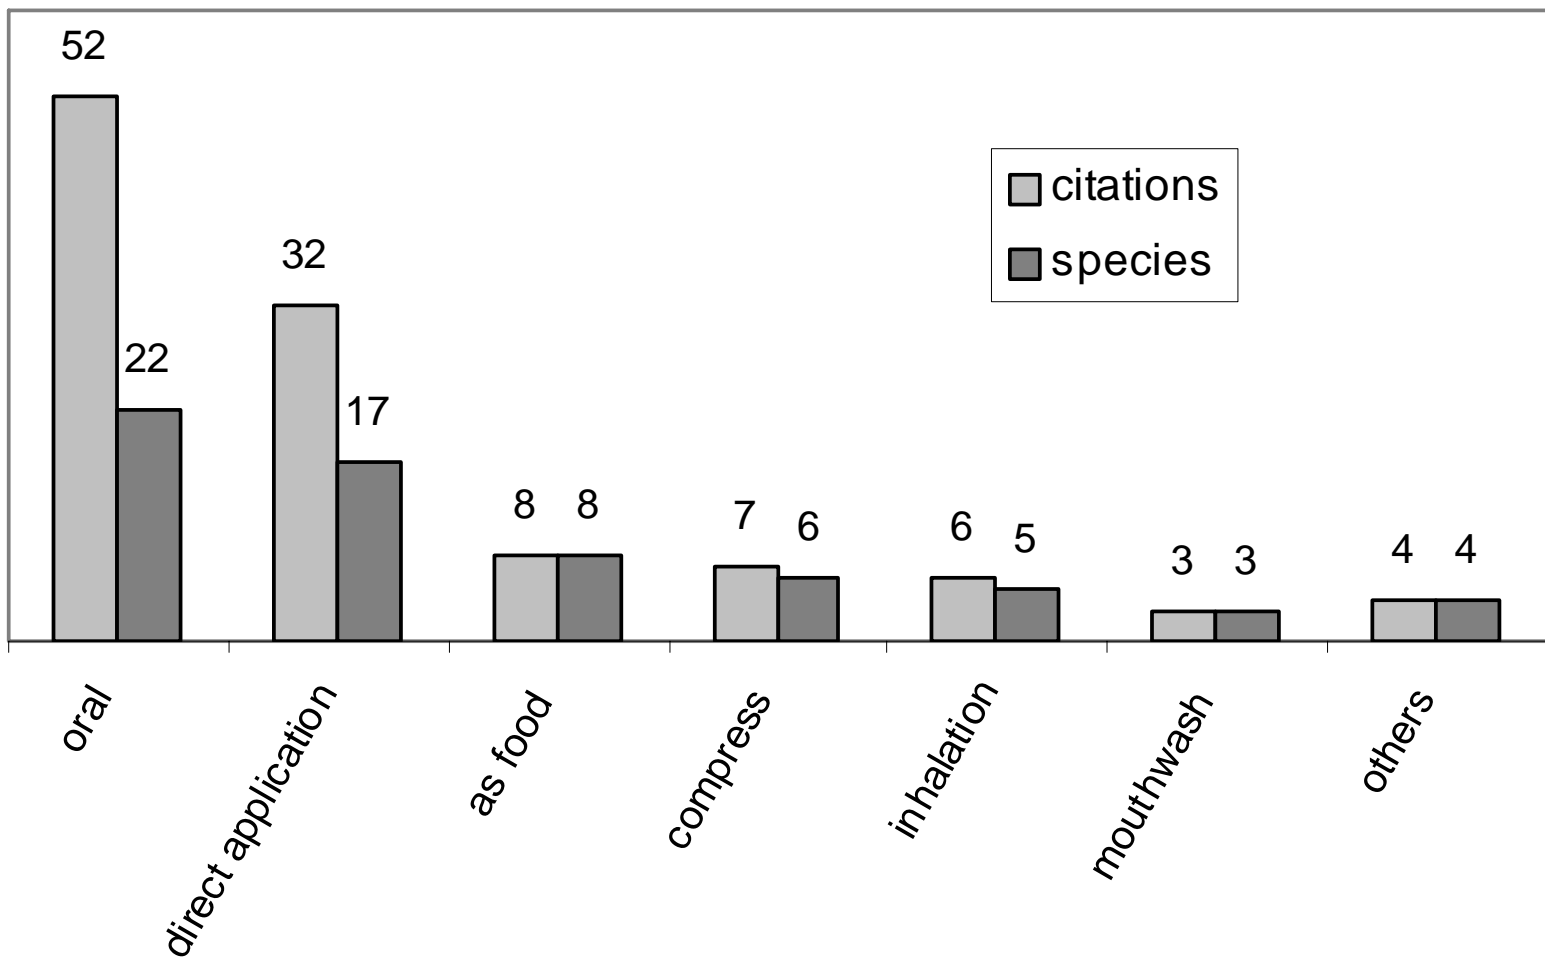

Supplement: MOESM11 [file 9627318]
